# Supplementary material for: Effects of Water Restriction and Supplementation on Cognitive Performances and Mood among Young Adults in Baoding, China: A Randomized Controlled Trial (RCT)
Source: MDPI journal article supplement (doi:10.3390/nu13103645), 2021-10-18
Supplement: s1 [file s1]

**Table S1** The criteria for the inclusion and exclusion of participants

|                                                  |
|--------------------------------------------------|
| Inclusion criteria                               |
| Aged 18-23 years                                 |
| Be healthy                                       |
| Exclusion criteria                               |
| Aged <18 or >23 years                            |
| Tobacco use                                      |
| Habitual alcohol (>20 g/day) consumption         |
| Habitual high caffeine (>250 mg/day) consumption |
| Vigorous-intensity physical activity habits      |
| Chronic diseases                                 |
| Claustrophobia                                   |
| Other neurologic illness                         |
| Other medical illness                            |

**Table S2** The outcomes of the study

|                                                                                      |
|--------------------------------------------------------------------------------------|
| The scores of the CP using software after intervention (primary outcome)             |
| The scores of the POMS using questionnaire after intervention (primary outcome)      |
| Urine osmolality, USG and the electrolytes concentrations                            |
| Plasma osmolality, the electrolytes concentrations and glucose                       |
| Anthropometric measurements including the height, weight and blood pressure          |
| CP: cognitive performance; POMS: Profile of mood states; USG: Urine specific gravity |
